# Supplementary material for: The N Termini of TAR DNA-Binding Protein 43 (TDP43) C-Terminal Fragments Influence Degradation, Aggregation Propensity, and Morphology
Source: PubMed Central journal article supplement (PMC6146831; doi:10.1128/mcb.00243-18), 2018-09-14
Supplement: zmb999101832s1.pdf [file zmb999101832s1.pdf]

**Supplemental Table S1.** Plasmids used in this study.

| Plasmid      | Description                                                                                                                                                                                 | Source or Reference |
|--------------|---------------------------------------------------------------------------------------------------------------------------------------------------------------------------------------------|---------------------|
| pCDNA3.0-Neo | Amp <sup>R</sup> ; Neo <sup>R</sup> ; Expression vector for cloning your gene of interest                                                                                                   | Invitrogen          |
| pGL3-Control | Amp <sup>R</sup> ; luciferase reporter driven by SV40 promoter. Also contains the SV40 enhancer.                                                                                            | Promega             |
| pX330        | Mammalian expression plasmid encoding a human codon-optimized SpCas9 and a chimeric guide RNA                                                                                               | Addgene,            |
| pKP551       | Amp <sup>R</sup> ; Trp, pBAM- Ub <sup>K48R</sup> -V-eKmCherry-Flag-Myc.                                                                                                                     | Brower, et al. 2013 |
| pCB326       | Amp <sup>R</sup> ; Neo <sup>R</sup> ; pcDNA3.0-based plasmid encoding f <sup>DHFR</sup> -Ub <sup>K48R</sup> -Asp <sup>219</sup> -TDP43 <sup>f</sup> under the control of T7 or CMV promoter | Brower, et al. 2013 |
| pCB328       | Amp <sup>R</sup> ; Neo <sup>R</sup> ; pcDNA3.0-based plasmid encoding f <sup>DHFR</sup> -Ub <sup>K48R</sup> -Val <sup>219</sup> -TDP43 <sup>f</sup> under the control of T7 or CMV promoter | Brower, et al. 2013 |
| pCB330       | Amp <sup>R</sup> ; Neo <sup>R</sup> ; pcDNA3.0-based plasmid encoding f <sup>DHFR</sup> -Ub <sup>K48R</sup> -Asp <sup>247</sup> -TDP43 <sup>f</sup> under the control of T7 or CMV promoter | Brower, et al. 2013 |
| pCB332       | Amp <sup>R</sup> ; Neo <sup>R</sup> ; pcDNA3.0-based plasmid encoding f <sup>DHFR</sup> -Ub <sup>K48R</sup> -Val <sup>247</sup> -TDP43 <sup>f</sup> under the control of T7 or CMV promoter | Brower, et al. 2013 |
| pCB334       | Amp <sup>R</sup> ; pGL3-Control-based plasmid encoding f <sup>DHFR</sup> -Ub <sup>K48R</sup> -Asp <sup>219</sup> -TDP43 <sup>f</sup> under the control of SV40 promoter                     | Brower, et al. 2013 |
| pCB336       | Amp <sup>R</sup> ; pGL3-Control-based plasmid encoding f <sup>DHFR</sup> -Ub <sup>K48R</sup> -Val <sup>219</sup> -TDP43 <sup>f</sup> under the control of SV40 promoter                     | Brower, et al. 2013 |
| pCB338       | Amp <sup>R</sup> ; pGL3-Control-based plasmid encoding f <sup>DHFR</sup> -Ub <sup>K48R</sup> -Asp <sup>247</sup> -TDP43 <sup>f</sup> under the control of SV40 promoter                     | Brower, et al. 2013 |
| pCB340       | Amp <sup>R</sup> ; pGL3-Control-based plasmid encoding f <sup>DHFR</sup> -Ub <sup>K48R</sup> -Val <sup>247</sup> -TDP43 <sup>f</sup> under the control of SV40 promoter                     | Brower, et al. 2013 |

|        |                                                                                                                                                                                        |                     |
|--------|----------------------------------------------------------------------------------------------------------------------------------------------------------------------------------------|---------------------|
| pCB398 | Amp <sup>R</sup> ; pGL3-Control-based plasmid encoding mCherry-Ub <sup>K48R</sup> -Asp <sup>219</sup> -TDP43 <sup>f</sup> under the control of SV40 promoter                           | This study          |
| pCB399 | Amp <sup>R</sup> ; pGL3-Control-based plasmid encoding mCherry-Ub <sup>K48R</sup> -Val <sup>219</sup> -TDP43 <sup>f</sup> under the control of SV40 promoter                           | This study          |
| pCB400 | Amp <sup>R</sup> ; pGL3-Control-based plasmid encoding mCherry-Ub <sup>K48R</sup> -Asp <sup>247</sup> -TDP43 <sup>f</sup> under the control of SV40 promoter                           | Brower, et al. 2013 |
| pCB401 | Amp <sup>R</sup> ; pGL3-Control-based plasmid encoding mCherry-Ub <sup>K48R</sup> -Val <sup>247</sup> -TDP43 <sup>f</sup> under the control of SV40 promoter                           | This study          |
| pCB431 | pX330-based plasmid encoding a human codon-optimized SpCas9 and a chimeric guide RNA targeting mouse ATE1                                                                              | This study          |
| pCB541 | Amp <sup>R</sup> ; pRS416MET25 encoding Ub <sup>K48R</sup> - Asp <sup>219</sup> -TDP43 <sup>f</sup> for expression in yeast                                                            | This study          |
| pCB542 | Amp <sup>R</sup> ; pRS416MET25 encoding Ub <sup>K48R</sup> - Val <sup>219</sup> -TDP43 <sup>f</sup> for expression in yeast                                                            | This study          |
| pCB543 | Amp <sup>R</sup> ; pRS416MET25 encoding Ub <sup>K48R</sup> - Asp <sup>247</sup> -TDP43 <sup>f</sup> for expression in yeast                                                            | This study          |
| pCB544 | Amp <sup>R</sup> ; pRS416MET25 encoding Ub <sup>K48R</sup> - Val <sup>247</sup> -TDP43 <sup>f</sup> for expression in yeast                                                            | This study          |
| pYK001 | Amp <sup>R</sup> ; pGL3-Control-based plasmid encoding mCherry-Ub <sup>K48R</sup> under the control of SV40 promoter                                                                   | This study          |
| pYK004 | Amp <sup>R</sup> ; pGL3-Control-based plasmid encoding mCherry-Ub <sup>K48R</sup> -Asp <sup>219</sup> -TDP43 <sup>f</sup> containing K224R mutation under the control of SV40 promoter | This study          |
| pYK005 | Amp <sup>R</sup> ; pGL3-Control-based plasmid encoding mCherry-Ub <sup>K48R</sup> -Asp <sup>219</sup> -TDP43 <sup>f</sup> containing K251R mutation under the control of SV40 promoter | This study          |
| pYK006 | Amp <sup>R</sup> ; pGL3-Control-based plasmid encoding mCherry-Ub <sup>K48R</sup> -Asp <sup>219</sup> -TDP43 <sup>f</sup> containing                                                   | This study          |

|        |                                                                                                                                                                                                          |            |
|--------|----------------------------------------------------------------------------------------------------------------------------------------------------------------------------------------------------------|------------|
|        | K263R mutation under the control of SV40 promoter                                                                                                                                                        |            |
| pYK007 | Amp <sup>R</sup> ; pGL3-Control-based plasmid encoding mCherry-Ub <sup>K48R</sup> -Asp <sup>247</sup> -TDP43 <sup>f</sup> containing K408R mutation under the control of SV40 promoter                   | This study |
| pYK009 | Amp <sup>R</sup> ; pGL3-Control-based plasmid encoding mCherry-Ub <sup>K48R</sup> -Asp <sup>219</sup> -TDP43 <sup>f</sup> containing K251 and K408R mutations under the control of SV40 promoter         | This study |
| pYK010 | Amp <sup>R</sup> ; pGL3-Control-based plasmid encoding mCherry-Ub <sup>K48R</sup> -Asp <sup>247</sup> -TDP43 <sup>f</sup> containing K408R mutation under the control of SV40 promoter                   | This study |
| pYK011 | Amp <sup>R</sup> ; pGL3-Control-based plasmid encoding mCherry-Ub <sup>K48R</sup> -Asp <sup>247</sup> -TDP43 <sup>f</sup> containing K251R mutation under the control of SV40 promoter                   | This study |
| pYK012 | Amp <sup>R</sup> ; pGL3-Control-based plasmid encoding mCherry-Ub <sup>K48R</sup> -Asp <sup>247</sup> -TDP43 <sup>f</sup> containing K263R mutation under the control of SV40 promoter                   | This study |
| pYK015 | Amp <sup>R</sup> ; pGL3-Control-based plasmid encoding mCherry-Ub <sup>K48R</sup> -Asp <sup>219</sup> -TDP43 <sup>f</sup> containing K251, K263R, and K408R mutations under the control of SV40 promoter | This study |
| pYK016 | Amp <sup>R</sup> ; pGL3-Control-based plasmid encoding mCherry-Ub <sup>K48R</sup> -Asp <sup>247</sup> -TDP43 <sup>f</sup> containing K251, K263R, and K408R mutations under the control of SV40 promoter | This study |
| pYK027 | Amp <sup>R</sup> ; Neo <sup>R</sup> ; pcDNA3.0-based plasmid encoding <sup>f</sup> DHFR-Ub <sup>K48R</sup> under the control of T7 or CMV promoter                                                       | This study |

**Supplemental Table S2.** Primers used in this study

| <b>Primer</b> | <b>Primer's sequence (5' to 3')</b>                                 |
|---------------|---------------------------------------------------------------------|
| <b>CB383F</b> | GATCAAGCTTCCCACCATGGTGAGCAAGGGCGAGGAGG                              |
| <b>CB384R</b> | GATCACCGGTCAGAGTCTTGACGAAAATCTGCATGGTCGACCCACTCTTGTACAGCTCGTCCATGCC |
| <b>CB431</b>  | CACCGTATCAGGATCTTATAGACCG                                           |
| <b>CB432</b>  | AAACCGGTCTATAAGATCCTGATAC                                           |
| <b>CB383F</b> | GATCAAGCTTCCCACCATGGTGAGCAAGGGCGAGGAGG                              |
| <b>CB384R</b> | GATCACCGGTCAGAGTCTTGACGAAAATCTGCATGGTCGACCCACTCTTGTACAGCTCGTCCATGCC |
| <b>CB515F</b> | TCAAGACTTTGACCGGTAAAACCATAACATTGG                                   |
| <b>CB516R</b> | GATTGAATTCTCGAGTCGACTCACTTGTCATCGTCGTCC                             |
| <b>YK001F</b> | GATCGGTACCGCCACCATGGACTACAAGGACGATGATGACAAGGGTTCCATGGTGAGCAAGGGCG   |
| <b>YK006R</b> | TTAACCACCGCGGAGCCTTAGCAC                                            |
| <b>YK007F</b> | TCTAGACCGGCCGCTTCGAGCAGAC                                           |
| <b>YK009R</b> | CCTGAATGGCCTGGGGATGAAGAC                                            |
| <b>YK010F</b> | GCCTTTGCCTTTGTTACATTTGCAG                                           |
| <b>YK013F</b> | CATATATCCAATGCCGAACCTAAGCAC                                         |
| <b>YK014R</b> | AACGCTGATTCTCTAATGATCAAGTCGTC                                       |
| <b>YK015F</b> | AATAGACAGTTAGAAAGAAGTGGAAGATTTGGTG                                  |
| <b>YK016R</b> | GCTATTGTGTCTAGGTTCCGGCATTG                                          |
| <b>YK017F</b> | ATGGATTCTAGGTCTTCTGGCTGGG                                           |
| <b>YK018R</b> | GCTTGAGCCAAAGCCTCCATTAACC                                           |
| <b>YK025F</b> | GACTTGATCATTAGAGGAATCAGCGTTCATATATCC                                |
| <b>YK026F</b> | GACTTGATCATTAAAGGAATCAGCGTTCATATATCC                                |
| <b>YK027R</b> | ACCACCGCGGAGCCTTAG                                                  |
| <b>YK032F</b> | TGATCTAGAGGGCCCTATTCTATAGTGTAC                                      |

**REFERENCES**(Brower et al., 2013) Brower, C.S., Piatkov, K.I., and Varshavsky, A. (2013). Neurodegeneration-associated protein fragments as short-lived substrates of the N-end rule pathway. *Molecular cell* 50, 161-171.
